# Supplementary material
Source: PubMed Central journal article supplement (PMC6082148)
Supplement: NIHMS976285-supplement-1.pdf [file NIHMS976285-supplement-1.pdf]

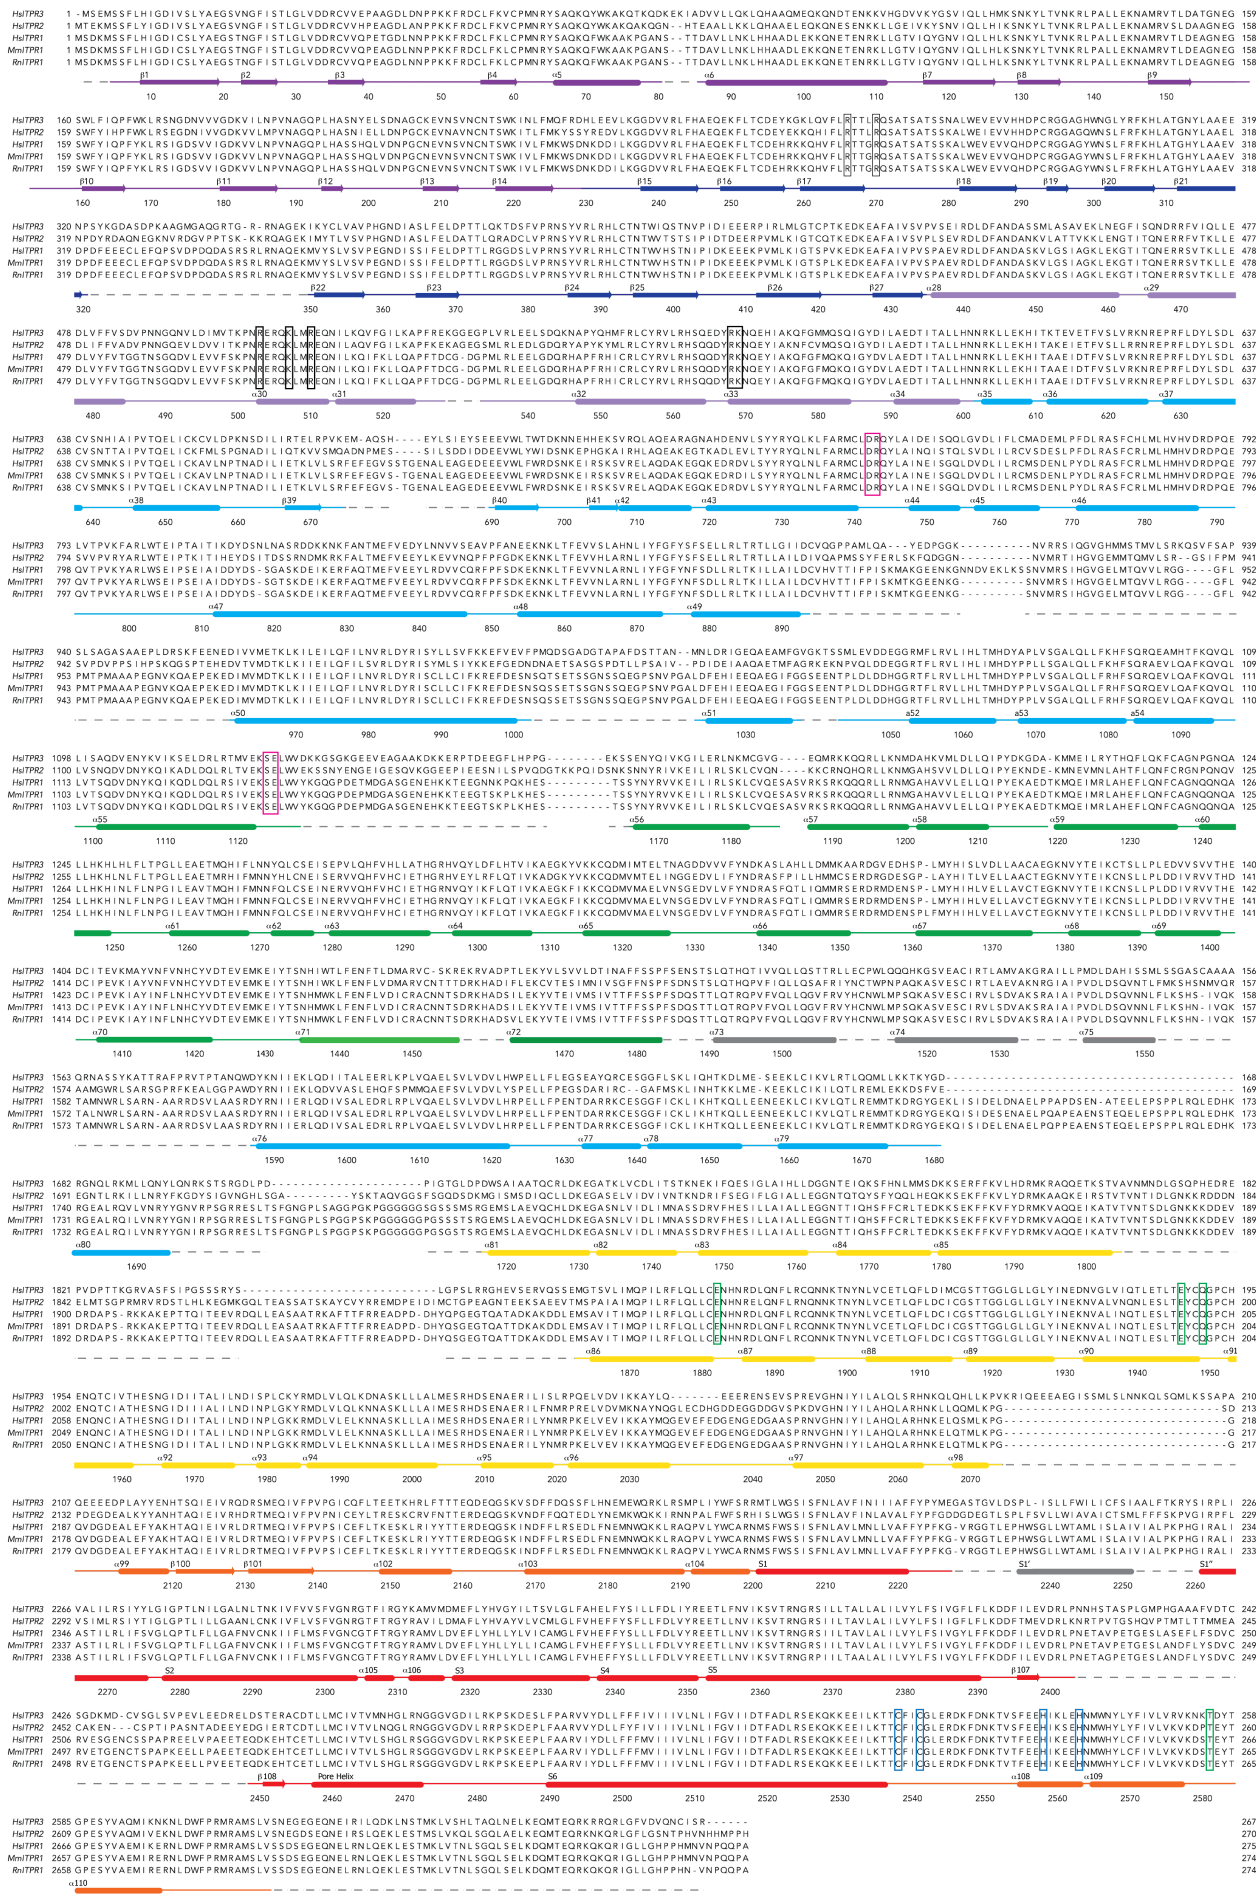

Supplementary Note 1

**Supplementary Note 1: Secondary structure of hIP<sub>3</sub>R3.** Secondary structural elements of hIP<sub>3</sub>R3 are matched against the primary sequence and colored by domain with BTF1 in purple, BTF2 in blue, ARM1 in violet, the CLD in cyan, ARM2 in green, ARM3 in yellow, the JD in orange and the TMD in red. Sequence of hIP<sub>3</sub>R3 is aligned with human IP<sub>3</sub>R1, human IP<sub>3</sub>R2, mouse IP<sub>3</sub>R1 and rat IP<sub>3</sub>R1. Residues not modeled in the structure are represented by dashed lines. Boxes denote residues that coordinate ligands. Black – IP<sub>3</sub>, magenta – CD Ca<sup>2+</sup>, green – JD Ca<sup>2+</sup> and blue – Zn<sup>2+</sup>. Jpred4 was used to estimate the approximate start and finish of the unregistered  $\alpha$ -helices in ARM2 and the TMD, which are colored in grey.

|                                                     | hIP <sub>3</sub> R3 apo CD focus refinement (EMD-7979) | hIP <sub>3</sub> R3 S1-S4 focus refinement (EMD-7980) | hIP <sub>3</sub> R3 IP <sub>3</sub> class 1 CD focus refinement (EMD-7982) | hIP <sub>3</sub> R3 IP <sub>3</sub> class 2 CD focus refinement (EMD-7985) | hIP <sub>3</sub> R3 Ca <sup>2+</sup> TMD focus refinement (EMD-7990) | hIP <sub>3</sub> R3 Ca <sup>2+</sup> CD focus refinement (EMD-7989) | hIP <sub>3</sub> R3 Low IP <sub>3</sub> -Ca <sup>2+</sup> TMD Focus Refinement (EMD-7993) | hIP <sub>3</sub> R3 Low IP <sub>3</sub> -Ca <sup>2+</sup> CD focus refinement (EMD-7992) | hIP <sub>3</sub> R3 High IP <sub>3</sub> -Ca <sup>2+</sup> TMD focus refinement (EMD-7995) | hIP <sub>3</sub> R3 High IP <sub>3</sub> -Ca <sup>2+</sup> CD focus refinement (EMD-7996) |
|-----------------------------------------------------|--------------------------------------------------------|-------------------------------------------------------|----------------------------------------------------------------------------|----------------------------------------------------------------------------|----------------------------------------------------------------------|---------------------------------------------------------------------|-------------------------------------------------------------------------------------------|------------------------------------------------------------------------------------------|--------------------------------------------------------------------------------------------|-------------------------------------------------------------------------------------------|
| <b>Data collection and processing</b>               |                                                        |                                                       |                                                                            |                                                                            |                                                                      |                                                                     |                                                                                           |                                                                                          |                                                                                            |                                                                                           |
| Magnification                                       | 105,000x                                               | 105,000x                                              | 22,500x                                                                    | 22,500x                                                                    | 22,500x                                                              | 22,500x                                                             | 22,500x                                                                                   | 22,500x                                                                                  | 22,500x                                                                                    | 22,500x                                                                                   |
| Voltage (kV)                                        | 300kV                                                  | 300kV                                                 | 300kV                                                                      | 300kV                                                                      | 300kV                                                                | 300kV                                                               | 300kV                                                                                     | 300kV                                                                                    | 300kV                                                                                      | 300kV                                                                                     |
| Electron exposure (e <sup>-</sup> /Å <sup>2</sup> ) | 60                                                     | 60                                                    | 61                                                                         | 61                                                                         | 61                                                                   | 61                                                                  | 61                                                                                        | 61                                                                                       | 61                                                                                         | 61                                                                                        |
| Defocus range (µm)                                  | -1.0 – 2.5                                             | -1.0 – 2.5                                            | -1.0 – 2.5                                                                 | -1.0 – 2.5                                                                 | -1.0 – 2.5                                                           | -1.0 – 2.5                                                          | -1.0 – 2.5                                                                                | -1.0 – 2.5                                                                               | -1.0 – 2.5                                                                                 | -1.0 – 2.5                                                                                |
| Pixel size (Å)                                      | 1.096                                                  | 1.096                                                 | 1.088                                                                      | 1.088                                                                      | 1.088                                                                | 1.088                                                               | 1.088                                                                                     | 1.088                                                                                    | 1.088                                                                                      | 1.088                                                                                     |
| Symmetry imposed                                    | C1                                                     | C1                                                    | C1                                                                         | C4                                                                         | C4                                                                   | C1                                                                  | C4                                                                                        | C1                                                                                       | C4                                                                                         | C1                                                                                        |
| Initial particle images (no.)                       | 211,068                                                | 211,068                                               | 428,144                                                                    | 185,800                                                                    | 49,060                                                               | 135,228                                                             | 74,277                                                                                    | 196,348                                                                                  | 170,308                                                                                    | 657,372                                                                                   |
| Final particle images (no.)                         | 119,904                                                | 81,299                                                | 428,144                                                                    | 185,800                                                                    | 33,807                                                               | 135,228                                                             | 49,087                                                                                    | 158,389                                                                                  | 77,871                                                                                     | 349,652                                                                                   |
| Map resolution (Å)                                  | 3.76                                                   | 3.69                                                  | 3.26                                                                       | 3.94                                                                       | 4.22                                                                 | 4.69                                                                | 3.80                                                                                      | 4.22                                                                                     | 3.66                                                                                       | 3.78                                                                                      |
| FSC threshold                                       | 0.143                                                  | 0.143                                                 | 0.143                                                                      | 0.143                                                                      | 0.143                                                                | 0.143                                                               | 0.143                                                                                     | 0.143                                                                                    | 0.143                                                                                      | 0.143                                                                                     |
| Map resolution range (Å)                            | 300-3.76                                               | 300-3.69                                              | 300-3.26                                                                   | 300-3.94                                                                   | 300-4.22                                                             | 300-4.69                                                            | 300-3.80                                                                                  | 300-4.22                                                                                 | 300-3.66                                                                                   | 300-3.78                                                                                  |

**Supplementary Table 1: Cryo-EM data collection, refinement and validation statistics for focused refinement reconstructions.**
